# Supplementary material for: Psychometric Properties of Modified MOS Social Support Survey 5-item (MSSS-5 item) among Iranian Older Adults
Source: Research Square preprint supplement (doi:10.21203/rs.3.rs-228805/v1), 2021-02-24
Supplement: Supplementary file 2 [file e06812c0dbd77a41027afde5.docx]

| **پرسشنامه کوتاه شده حمایت اجتماعی MOS فرمت 5 سوالی(MSSS-5 item)** | | |
| --- | --- | --- |
| لطفا هر یک از عبارات را به دقت بخوانید (گوش دهید) و با توجه به میزان بهره مندي خود از از حمایت دیگران (مانند همنشینی، کمک گرفتن و یا انواع دیگر حمایت ها) یکی از گزینه ها را انتخاب نمایید. | | |
| شماره | **سوال** | **گزينه‏هاي پاسخ** |
| 1 | 1. آیا کسی را دارید که موقع نیاز برایتان غذا اماده کند؟ | □ هیچ وقت □ به ندرت □ گاهی اوقات □ بیشتر اوقات □ همیشه |
| 2 | در صورت بیمار بودنتان، شما را دکتر ببرد؟ | □ هیچ وقت □ به ندرت □ گاهی اوقات □ بیشتر اوقات □ همیشه |
| 3 | اوقات خوشی را با او داشته باشید؟ | □ هیچ وقت □ به ندرت □ گاهی اوقات □ بیشتر اوقات □ همیشه |
| 4 | مشکلات شما را درک کند؟ | □ هیچ وقت □ به ندرت □ گاهی اوقات □ بیشتر اوقات □ همیشه |
| 5 | شما را در آغوش بگیرد؟ | □ هیچ وقت □ به ندرت □ گاهی اوقات □ بیشتر اوقات □ همیشه |
| نمره کل با جمع نمرات 5 سوال محاسبه می شود. محدوده نمره خام پرسشنامه عددی بین 5 و 25 است که نمرات بالاتر نشان دهنده برخورداری از حمایت بیشتر است. گزینه هیچ وقت نمره یک و گزینه همیشه نمره پنج را به خود اختصاص می دهد. دو سوال اول حمایت ابزاری و سه سوال آخر، حمایت عاطفی را بررسی می کنند.  جهت محاسبه نمره کل بر اساس 100 از فرمول زیر استفاده می شود. | | |

Additional file 1
